# Supplementary material for: Indicators of retention in remote digital health studies: a cross-study evaluation of 100,000 participants
Source: PubMed Central journal article supplement (PMC7026051; doi:10.1038/s41746-020-0224-8), 2020-02-17

**Supplementary Table 1:** Comparison of median survival time (with 95% confidence intervals) across studies using two analytical approaches with and without censoring.s

| Strata        | N     | No censoring |        | With right censoring |        |
|---------------|-------|--------------|--------|----------------------|--------|
|               |       | median       | 95% CI | median               | 95% CI |
| SleepHealth   | 12850 | 2            | 2-2    | 2                    | 2-2    |
| Brighten      | 875   | 26           | 17-33  | 26                   | 18-33  |
| Asthma        | 4666  | 12           | 11-13  | 12                   | 11-13  |
| ElevateMS     | 605   | 7            | 5-10   | 7                    | 5-10   |
| mPower        | 6908  | 4            | 4-5    | 4                    | 4-4    |
| Phendo        | 7802  | 4            | 3-4    | 3                    | 3-4    |
| MyHeartCounts | 18671 | 9            | 9-9    | 8                    | 8-9    |
| Start         | 42237 | 2            | 2-2    | 2                    | 2-3    |

**Supplementary Table 2:** Comparison of median survival time (with 95% confidence intervals) across gender(Female vs Male) stratified by studies using two analytical approaches with and without censoring.

| Strata                      | N     | No censoring |        | With right censoring |        |
|-----------------------------|-------|--------------|--------|----------------------|--------|
|                             |       | median       | 95% CI | median               | 95% CI |
| gender=Female SleepHealth   | 3659  | 2            | 2-2    | 2                    | 2-2    |
| gender=Female Brighten      | 681   | 25           | 16-33  | 26                   | 16-34  |
| gender=Female Asthma        | 993   | 9            | 7-12   | 9                    | 7-11   |
| gender=Female ElevateMS     | 244   | 35           | 26-49  | 39                   | 26-53  |
| gender=Female mPower        | 1998  | 4            | 4-5    | 4                    | 3-5    |
| gender=Female Phendo        | 7532  | 4            | 3-4    | 3                    | 3-4    |
| gender=Female MyHeartCounts | 1320  | 12           | 11-13  | 12                   | 11-13  |
| gender=Female Start         | 32067 | 2            | 2-2    | 2                    | 2-3    |
| gender=Male SleepHealth     | 8898  | 2            | 2-2    | 2                    | 1-2    |
| gender=Male Brighten        | 194   | 30           | 12-44  | 30                   | 12-44  |
| gender=Male Asthma          | 1516  | 7            | 5-9    | 7                    | 6-9    |
| gender=Male ElevateMS       | 85    | 26           | 16-57  | 45                   | 26-75  |
| gender=Male mPower          | 4886  | 4            | 4-5    | 4                    | 4-4    |
| gender=Male MyHeartCounts   | 5641  | 14           | 13-14  | 14                   | 13-15  |
| gender=Male Start           | 10170 | 2            | 2-2    | 3                    | 2-3    |

**Supplementary Table 3:** Comparison of median survival time (with 95% confidence intervals) across age groups stratified by studies using two analytical approaches with and without censoring.

| Strata                        | N     | No censoring |        | With right censoring |        |
|-------------------------------|-------|--------------|--------|----------------------|--------|
|                               |       | median       | 95% CI | median               | 95% CI |
| age_group=18-29 SleepHealth   | 4063  | 2            | 2-2    | 1                    | 1-1    |
| age_group=18-29 Brighten      | 438   | 18.5         | 13-31  | 19.5                 | 13-31  |
| age_group=18-29 Asthma        | 1088  | 4            | 3-4    | 3                    | 2-4    |
| age_group=18-29 ElevateMS     | 62    | 1            | 1-3    | 1                    | 1-2    |
| age_group=18-29 mPower        | 2139  | 2            | 1-2    | 1                    | 1-1    |
| age_group=18-29 Phendo        | 4145  | 3            | 3-4    | 3                    | 3-4    |
| age_group=18-29 MyHeartCounts | 390   | 2            | 2-4    | 2                    | 1-3    |
| age_group=18-29 Start         | 23537 | 2            | 2-2    | 2                    | 2-2    |
| age_group=30-39 SleepHealth   | 3558  | 2            | 2-2    | 2                    | 1-2    |
| age_group=30-39 Brighten      | 220   | 35           | 20-49  | 35                   | 20-49  |
| age_group=30-39 Asthma        | 699   | 8            | 6-10   | 8                    | 6-11   |
| age_group=30-39 ElevateMS     | 151   | 6            | 2-12   | 5                    | 2-12   |
| age_group=30-39 mPower        | 1251  | 3            | 2-3    | 2                    | 2-3    |
| age_group=30-39 Phendo        | 2701  | 4            | 3-5    | 4                    | 3-4    |
| age_group=30-39 MyHeartCounts | 505   | 3            | 2-4    | 3                    | 2-6    |
| age_group=30-39 Start         | 10200 | 2            | 2-3    | 3                    | 3-4    |
| age_group=40-49 SleepHealth   | 2574  | 2            | 2-3    | 2                    | 2-2    |
| age_group=40-49 Brighten      | 129   | 39           | 12-65  | 39                   | 12-68  |
| age_group=40-49 Asthma        | 362   | 12           | 9-19   | 13                   | 9-21   |
| age_group=40-49 ElevateMS     | 162   | 8            | 5-13   | 7.5                  | 5-13   |
| age_group=40-49 mPower        | 898   | 5            | 4-6    | 5                    | 4-6    |
| age_group=40-49 Phendo        | 616   | 4            | 3-6    | 4                    | 3-5    |
| age_group=40-49 MyHeartCounts | 253   | 8            | 5-10   | 7                    | 4-10   |
| age_group=40-49 Start         | 5236  | 2            | 2-2    | 3                    | 2-3    |
| age_group=50-59 SleepHealth   | 1363  | 3            | 3-4    | 3                    | 2-4    |
| age_group=50-59 Brighten      | 61    | 42           | 14-83  | 42                   | 14-83  |
| age_group=50-59 Asthma        | 228   | 32.5         | 19-53  | 36                   | 20-56  |
| age_group=50-59 ElevateMS     | 126   | 12           | 7-24   | 11                   | 7-24   |
| age_group=50-59 mPower        | 927   | 9            | 7-10   | 10                   | 8-12   |
| age_group=50-59 Phendo        | 19    | 1            | 1-30   | 1                    | 1-73   |
| age_group=50-59 MyHeartCounts | 188   | 6            | 4-10   | 6                    | 4-10   |
| age_group=50-59 Start         | 2204  | 2            | 1-2    | 3                    | 2-4    |
| age_group=60+ SleepHealth     | 833   | 4            | 3-6    | 4                    | 3-6    |
| age_group=60+ Brighten        | 27    | 1            | 1-25   | 1                    | 1-25   |
| age_group=60+ Asthma          | 135   | 57           | 40-70  | 57                   | 39-70  |
| age_group=60+ ElevateMS       | 68    | 18           | 8-53   | 20                   | 8-75   |
| age_group=60+ mPower          | 1588  | 15           | 13-17  | 15                   | 13-19  |
| age_group=60+ Phendo          | 3     | 1            | 1-1    | 1                    | 1-1    |
| age_group=60+ MyHeartCounts   | 216   | 9.5          | 7-17   | 11                   | 7-26   |
| age_group=60+ Start           | 1046  | 1            | 1-1    | 2                    | 1-2    |

**Supplementary Table 4:** Comparison of median survival time (with 95% confidence intervals) across disease of interest to the study(True/False) stratified by studies using two analytical approaches with and without censoring.

| Strata                         | N     | No Censoring |        | With right censoring |        |
|--------------------------------|-------|--------------|--------|----------------------|--------|
|                                |       | median       | 95% CI | median               | 95% CI |
| caseStatus=FALSE SleepHealth   | 12269 | 2            | 2-2    | 2                    | 1-2    |
| caseStatus=FALSE Asthma        | 86    | 12           | 6-20   | 12.5                 | 5-20   |
| caseStatus=FALSE ElevateMS     | 132   | 1            | 1-2    | 1                    | 1-1    |
| caseStatus=FALSE mPower        | 4049  | 3            | 3-3    | 3                    | 2-3    |
| caseStatus=FALSE MyHeartCounts | 15666 | 10           | 9-10   | 9                    | 9-9    |
| caseStatus=TRUE SleepHealth    | 500   | 16.5         | 14-20  | 16.5                 | 14-20  |
| caseStatus=TRUE Asthma         | 4249  | 14           | 13-15  | 14                   | 13-15  |
| caseStatus=TRUE ElevateMS      | 473   | 12           | 8-14   | 11                   | 7-15   |
| caseStatus=TRUE mPower         | 1896  | 15           | 13-17  | 15.5                 | 14-19  |
| caseStatus=TRUE MyHeartCounts  | 1009  | 10           | 9-11   | 10                   | 9-11   |

**Supplementary Table 5:** Comparison of median survival time (with 95% confidence intervals) across participants that were clinically referred(True/False) stratified by studies using two analytical approaches with and without censoring. \*After right censoring, the retention in the clinically-referred cohort in the mPower study did not drop below 50%. Therefore the lowest retention time(76 days) for 52.9% retention is shown.

| Strata                           | N    | No censoring |        | With right censoring |        |
|----------------------------------|------|--------------|--------|----------------------|--------|
|                                  |      | median       | 95% CI | median               | 95% CI |
| clinicalReferral=FALSE ElevateMS | 469  | 4            | 2-6    | 4                    | 2-6    |
| clinicalReferral=FALSE mPower    | 6836 | 4            | 4-4    | 4                    | 4-4    |
| clinicalReferral=TRUE ElevateMS  | 136  | 25.5         | 17-55  | 26                   | 17-56  |
| clinicalReferral=TRUE mPower     | 72   | 58.5         | 51-83  | > 76*                | 55-NA  |

**Supplementary Table 6:** Change in median survival time (with 95% CI) based on the minimum number of days(N = 1-32) a subset of participants continued to use the study apps

| Study         | minimum duration | median | 95% CI |
|---------------|------------------|--------|--------|
| SleepHealth   | 1                | 2      | 2-2    |
| Brighten      | 1                | 26     | 17-33  |
| Asthma        | 1                | 12     | 11-13  |
| ElevateMS     | 1                | 7      | 5-10   |
| mPower        | 1                | 4      | 4-5    |
| Phendo        | 1                | 4      | 3-4    |
| MyHeartCounts | 1                | 9      | 9-9    |
| Start         | 1                | 2      | 2-2    |
| SleepHealth   | 2                | 6      | 6-7    |
| Brighten      | 2                | 71     | 63-81  |
| Asthma        | 2                | 23     | 21-24  |
| ElevateMS     | 2                | 26     | 21-35  |
| mPower        | 2                | 13     | 13-14  |
| Phendo        | 2                | 16     | 15-17  |
| MyHeartCounts | 2                | 12     | 12-13  |
| Start         | 2                | 16     | 16-17  |
| SleepHealth   | 4                | 13     | 12-13  |
| Brighten      | 4                | 75     | 66-83  |
| Asthma        | 4                | 27     | 25-29  |
| ElevateMS     | 4                | 35     | 26-46  |
| mPower        | 4                | 20     | 19-21  |
| Phendo        | 4                | 25     | 24-27  |
| MyHeartCounts | 4                | 14     | 14-14  |
| Start         | 4                | 21     | 20-22  |
| SleepHealth   | 8                | 21     | 20-22  |
| Brighten      | 8                | 81     | 72-83  |
| Asthma        | 8                | 33     | 31-35  |
| ElevateMS     | 8                | 48     | 37-57  |
| mPower        | 8                | 28     | 26-29  |
| Phendo        | 8                | 36     | 34-38  |
| MyHeartCounts | 8                | 17     | 16-17  |
| Start         | 8                | 29     | 28-29  |
| SleepHealth   | 16               | 36     | 34-38  |
| Brighten      | 16               | 83     | 82-83  |
| Asthma        | 16               | 44     | 42-46  |
| ElevateMS     | 16               | 69     | 57-75  |
| mPower        | 16               | 42     | 41-44  |

|               |    |    |       |
|---------------|----|----|-------|
| Phendo        | 16 | 49 | 47-51 |
| MyHeartCounts | 16 | 35 | 34-36 |
| Start         | 16 | 35 | 35-36 |
| SleepHealth   | 32 | 60 | 57-62 |
| Brighten      | 32 | 84 | 83-NA |
| Asthma        | 32 | 64 | 61-66 |
| ElevateMS     | 32 | 77 | 75-81 |
| mPower        | 32 | 58 | 56-60 |
| Phendo        | 32 | 65 | 63-67 |
| MyHeartCounts | 32 | 60 | 59-62 |
| Start         | 32 | 52 | 51-53 |

**Supplementary Table 7:** Proportion of missingness in the selected demographics across all the eight studies

| <b>Demographics Variable<br/>%(N)</b> | <b>Asthma</b>   | <b>Brighten</b> | <b>ElevateMS</b> | <b>mPower</b> | <b>MyHeartCounts</b> | <b>Phendo</b>   | <b>SleepHealth</b> | <b>Start</b>     |
|---------------------------------------|-----------------|-----------------|------------------|---------------|----------------------|-----------------|--------------------|------------------|
| Age                                   | 41.24<br>(1763) | 0.8<br>(7)      | 5.95<br>(36)     | 1.53<br>(106) | 91.47<br>(16669)     | 0.64<br>(48)    | 2.96<br>(378)      | 0.03<br>(14)     |
| Gender                                | 41.31<br>(1766) | 0.8<br>(7)      | 45.62<br>(276)   | 0             | 83.1<br>(15145)      | 0               | 1.66<br>(212)      | 0                |
| Race                                  | 23.42<br>(1001) | 0.8<br>(7)      | 44.79<br>(271)   | 0.46<br>(32)  | 74.25<br>(13532)     | 0.03<br>(2)     | 58.41<br>(7459)    | NA               |
| State                                 | 62.83<br>(2686) | 7.19<br>(63)    | 45.45<br>(275)   | 7.09<br>(490) | 41.55<br>(7572)      | 53.32<br>(4016) | 100<br>(12770)     | 44.84<br>(19148) |

**Supplementary Table 8:** Summary of participants' daily study app usage behavior and demographics across five distinct engagement clusters

| <b>Cluster Characteristics</b>                                           | <b>dedicated</b> | <b>high</b> | <b>moderate</b> | <b>sporadic</b> | <b>abandoners</b> |
|--------------------------------------------------------------------------|------------------|-------------|-----------------|-----------------|-------------------|
|                                                                          | <b>C1</b>        | <b>C2</b>   | <b>C3</b>       | <b>C4</b>       | <b>C5*</b>        |
| <b>N</b>                                                                 | 3,369            | 4,847       | 14,339          | 16,607          | 55,452            |
| <b>Proportion of Participants(%)</b><br>(median ± IQR)                   | 3.5 ± 2.5        | 6 ± 3.1     | 12.5 ± 2.9      | 21 ± 9.6        | 54.6 ± 17.3       |
| <b>Duration in study app</b><br>(median ± IQR)                           | 81 ± 22          | 53 ± 37     | 18 ± 21         | 19 ± 25         | 1 ± 1             |
| <b>Regularity of app usage in the first 84 days(%)</b><br>(median ± IQR) | 96.4 ± 26.2      | 63.1 ± 44.1 | 21.4 ± 25       | 22.6 ± 29.8     | 1.2 ± 1.2         |
| <b>Days Active in study app</b><br>(median ± IQR)                        | 39 ± 39          | 24 ± 13     | 9 ± 5           | 4 ± 3           | 1 ± 1             |
| <b>Days between activity</b><br>(median ± IQR)                           | 2 ± 1            | 2 ± 1       | 2 ± 1           | 5 ± 7           | NA                |
| <b>Age group - (median ± IQR)</b>                                        |                  |             |                 |                 |                   |
| 18-29                                                                    | 20.5 ± 29.2      | 28.3 ± 31.7 | 33.7 ± 35.7     | 33 ± 26         | 45.1 ± 18.6       |
| 30-39                                                                    | 21.5 ± 12.4      | 26.5 ± 7.3  | 27.8 ± 4.6      | 28 ± 8.1        | 27.8 ± 7.7        |
| 40-49                                                                    | 15.7 ± 5.4       | 16 ± 9.6    | 14.2 ± 10.8     | 15.5 ± 4.3      | 13.6 ± 3.3        |
| 50-59                                                                    | 12.4 ± 12.5      | 12.2 ± 9.1  | 10 ± 8.8        | 11.2 ± 8.5      | 8 ± 4.9           |
| 60+                                                                      | 17.2 ± 29.3      | 15.1 ± 11.7 | 11.7 ± 11.3     | 6.3 ± 9.2       | 5.1 ± 6.6         |
| <b>Race/Ethnicity (median ± IQR)</b>                                     |                  |             |                 |                 |                   |
| Non-Hispanic White                                                       | 82.8 ± 4.8       | 78.4 ± 9.9  | 77.6 ± 9.3      | 71.6 ± 9.3      | 73.6 ± 8.5        |
| Hispanic/Latinos                                                         | 6.5 ± 3.6        | 7.5 ± 5.4   | 10.3 ± 6.6      | 8.8 ± 5.4       | 9.3 ± 8.1         |
| African-American/Black                                                   | 5.3 ± 3.5        | 3.3 ± 1.6   | 3.2 ± 2.8       | 5.3 ± 3.2       | 4.4 ± 3.5         |
| Asian                                                                    | 3.7 ± 2.8        | 4.8 ± 2.1   | 5.3 ± 2.6       | 8 ± 3.6         | 6 ± 2.5           |
| AIAN                                                                     | 0.7 ± 0.5        | 0.6 ± 0.4   | 0.3 ± 0.2       | 0.8 ± 0.1       | 0.4 ± 0.3         |
| Hawaiian or other Pacific Islander                                       | 0.6 ± 0.3        | 0.5 ± 0.6   | 0.3 ± 0.7       | 0.6 ± 0.6       | 0.5 ± 0.4         |
| Other                                                                    | 3.5 ± 1.8        | 3.8 ± 2.7   | 5 ± 3.1         | 4.5 ± 2.3       | 6 ± 2.6           |

**Supplementary Figure 1:** Sensitivity analysis comparing the participant retention across **a)** age groups including participants for whom age was not available and **b)** gender including participants with missing gender. For all survival curves, the shaded region shows the 95% confidence limits based on the survival model fit.s

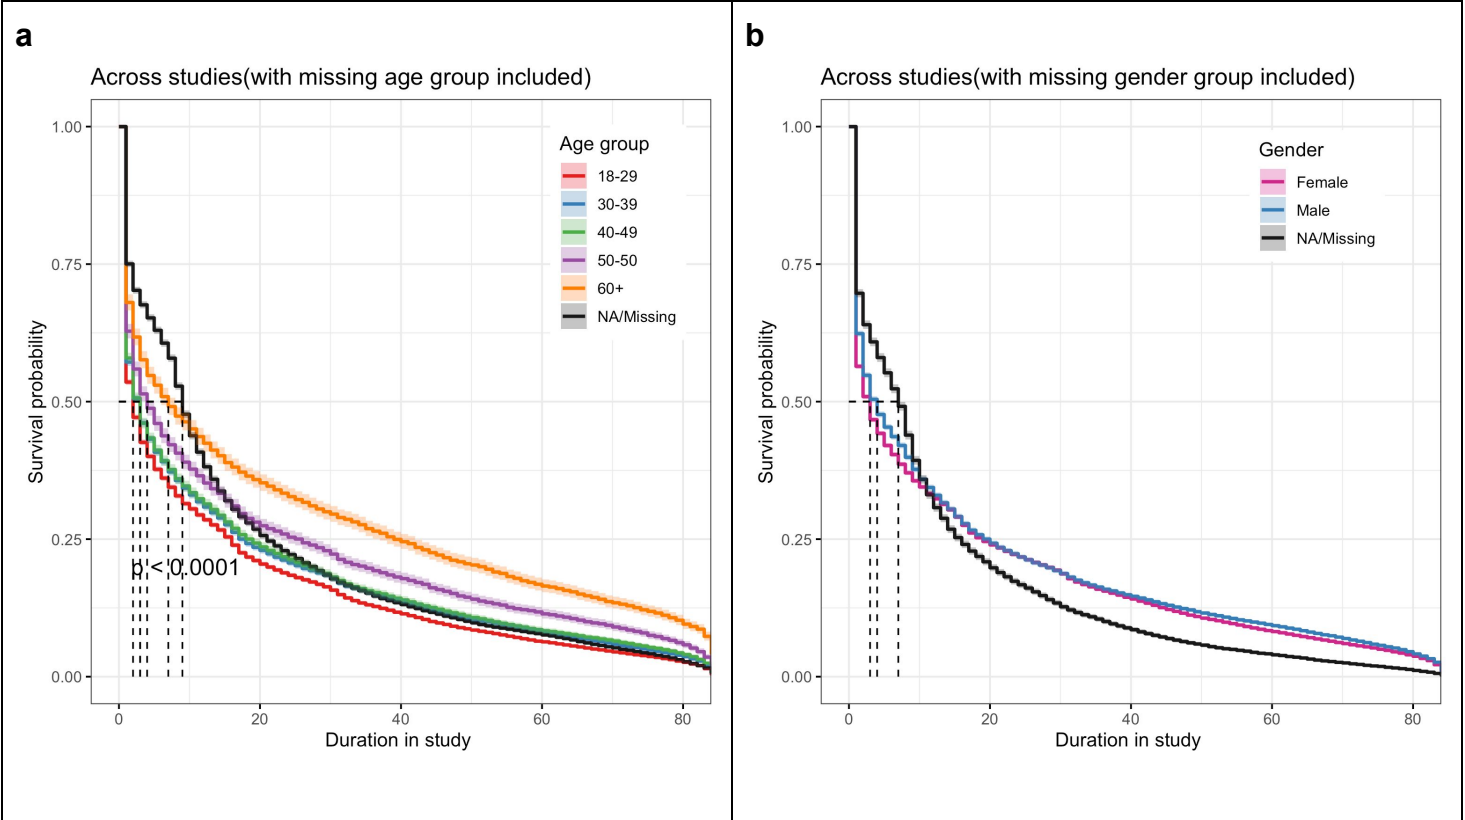

**Supplementary Figure 2:** Comparison of within-cluster variations across studies using different cluster sizes (N=1-10) for K-means clustering. Seven out of eight studies showed the within-cluster variation to be minimum by partitioning the daily app usage into four clusters.

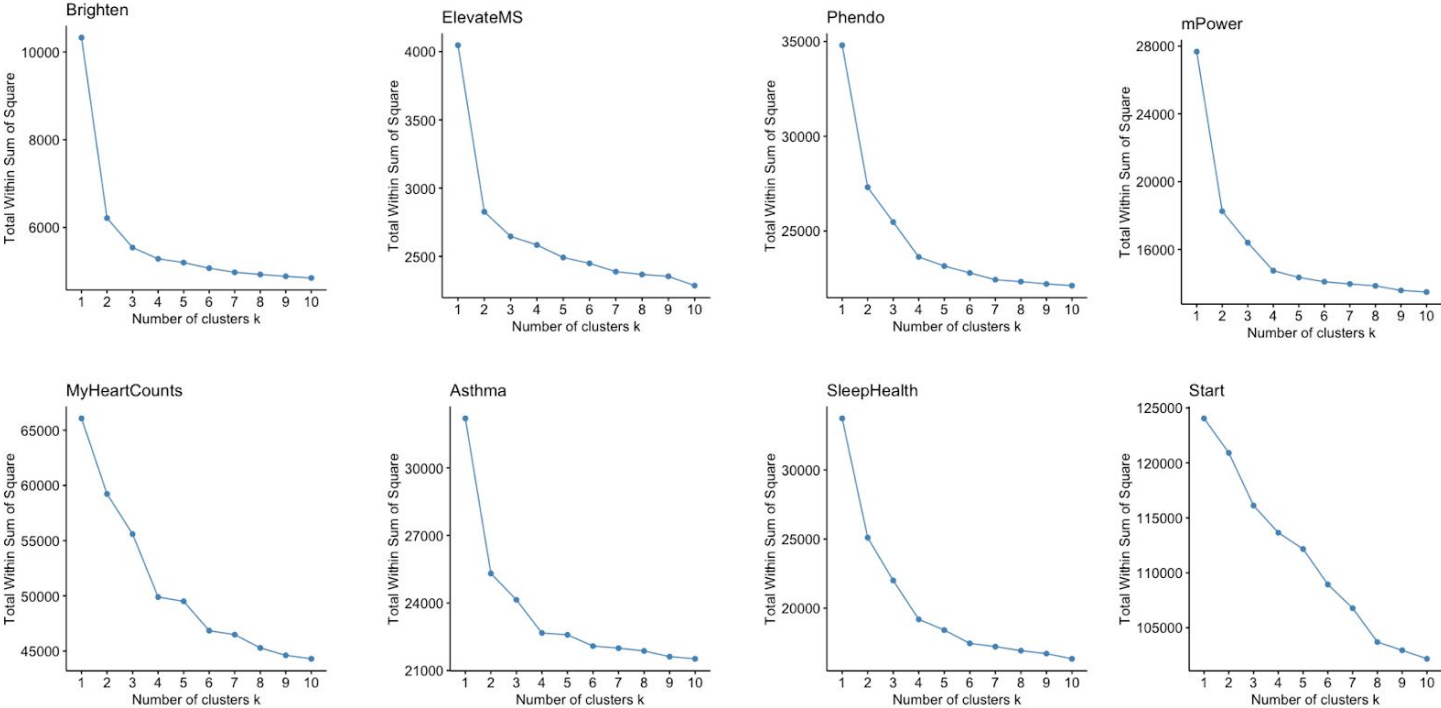

Supplement: 41746_2020_224_MOESM1_ESM.pdf [file 41746_2020_224_MOESM1_ESM.pdf]
